# Supplementary material
Source: PubMed Central journal article supplement (PMC8218670)
Supplement: aac.02502-20-s0001.pdf [file aac.02502-20-s0001.pdf]

# 1 Supplementary Material

2

## 3 Methods

4

### 5 Sanger sequencing and GenoType MTBDRs/ VER 2.0

6 All isolates to be Sanger sequenced were re-cultured from frozen bacterial stock cultures. For isolates of  
7 sample set 1, the sequence of the *eis*-promoter region in each isolate was determined by PCR amplification  
8 of thermal lysates followed by Sanger sequencing. Each isolate of sample set 1 for which Sanger  
9 sequencing detected an *eis*-promoter mutation, Sanger sequencing was repeated once to confirm the  
10 result. Isolates from sample set 2 were Sanger sequenced to confirm WGS results, using the same DNA  
11 that was used for WGS (see below). Briefly, the PCR reaction mix contained the following final  
12 concentrations of: 1x HotStartTaq *Plus* Master Mix (Qiagen, San Diego, CA, USA), 500nM of each primer  
13 (forward 5' CCATGGGACCGGTACTTGCT 3', reverse 5' ACTTCACCAGGCACCGTCAA 3'), and 1x SYTO 9 Green  
14 Fluorescent Nucleic Acid Stain (Thermo Fisher Scientific). As template, 1ul of thermal lysate (sample set 1)  
15 or purified DNA (sample set 2) was added to the reaction mix. Amplification of the *eis*-promoter region of  
16 the selected isolates was carried out using a CFX96™ Real-Time System C1000 Touch Thermal Cycler  
17 (BioRad) running the following thermocycling protocol: Initial denaturation at 95°C for 5min, followed by  
18 40 cycles of 95°C for 1min, annealing at 62°C for 1min and elongation at 72°C for 1min, followed by a final  
19 elongation at 72°C for 10min. Successful amplification was confirmed by a high-resolution melt from 80°C  
20 – 95°C with an increment of 0.5°C, each increment temperature held for 5 seconds.

21 Isolates which repeatedly failed to amplify were excluded from further analyses. Successfully amplified  
22 PCR products were sent to the Central DNA Sequencing Facilities of Stellenbosch University for targeted  
23 Sanger sequencing using the forward PCR Primer. The resulting chromatographs were analyzed using

24 BioEdit Sequence Alignment Editor v. 7.2.5 (1) comparing them to the *Mycobacterium tuberculosis* H37Rv  
25 reference genome (Accession number: AL123456).

26 The GenoType MTBDRs/ VER 2.0 (MTBDRs/) assay was done according to the manufacturer's protocol using  
27 the same DNA used for WGS (if not indicated otherwise). Failing assays (*e.g.*, complete gene locus control  
28 or conjugate control band missing; defined as per manufacturer's protocol) were repeated once. The  
29 analytical sensitivity (limit of detection) of the MTBDRs/ assay is  $1.65 \times 10^5$  bacteria/ml for culture samples  
30 and 150 bacteria/ml for clinical samples (2).

31

### 32 Phenotypic Drug Susceptibility Testing and Minimum Inhibitory Concentration Determination

33 All isolates used in this study (sample sets 1 and 2), were initially subjected to routine pDST on solid  
34 Löwenstein Jensen medium against INH, RIF, AMK and ofloxacin (OFX). Susceptibility was determined  
35 according to the 1% proportion method at clinical breakpoints of 0.2ug/ml for INH, 40.0ug/ml for RIF,  
36 30ug/ml for AMK and 2ug/ml for OFX (3, 4). MICs for KAN were subsequently determined for isolates with  
37 an *eis*-promoter mutation missed by the MTBDRs/ (sample set 1) and for representatives of each additional  
38 (combination of) *eis*-promoter mutation(s) (sample set 2). These MICs were done using two-fold serial  
39 dilutions ranging from 10.0ug/ml to 1.25ug/ml using the BACTEC MGIT 960 system with the TB eXiST  
40 module of the EpiCentre software at Stellenbosch University (5). Susceptibility to KAN and AMK (*i.e.*, pDST  
41 at Stellenbosch University) was based on a clinical breakpoint of 2.5ug/ml for KAN and 30ug/ml for AMK  
42 as per the 1% proportion method, defined as the lowest drug concentration that inhibits > 99% of growth.  
43 One isolate showed intermediate growth (*i.e.*, growth of > 100 growth units [GU] within seven days after  
44 the growth control reached a GU of 400) at all measured drug concentrations. The bacteria that grew  
45 under KAN pressure (intermediate growth < 1%; bacteria from the 10ug/ml drug containing tube) were re-  
46 grown in KAN containing medium (*i.e.*, selective sub-culturing), and pDST and subsequent Sanger  
47 sequencing were repeated following the procedures described above.

## 48 Whole genome sequencing

49 For WGS each isolate was re-cultured from culture stocks and DNA was extracted by standard procedures  
50 as previously described (6). Whole genome sequencing libraries had been prepared using the standard  
51 genomic DNA sample preparation kits from Illumina (Illumina, Inc, San Diego, CA), following the  
52 manufacturer's protocol. The libraries were sequenced on an Illumina HiSeq or Illumina NextGen Seq  
53 platform. The resulting sequencing reads were mapped to the *Mtb* H37Rv reference strain (Accession No.  
54 AL123456). Variant calling and annotation were conducted using a within-house pipeline including 3  
55 mappers (Burrows-Wheeler Alignment tool, NovoAlign, Smalt) (7–9) and 2 variant callers (GATK Gene  
56 Analysis Tool Kit, SAMtools) (7, 10) as previously described (11). Sequences with an average coverage  
57 below 20x for 2 or 3 of the mappers and/or with mapped reads <80% for 2 or 3 of the mappers were  
58 excluded, resulting in an average coverage (*i.e.*, average across the three mappers) of 35x to 443x per  
59 isolate. Only SNVs called from all 3 alignment bam files were considered high confidence SNVs. No  
60 frequency cut-off was applied, and variants detected at a frequency  $\geq 95\%$  were considered fixed. The  
61 genotypic drug resistance profile of each isolate was determined using markers defined by Coll *et al* and  
62 Miotto *et al* (12, 13). Artemis (14) was used to visually inspect sequencing reads. Based on this visual  
63 inspection of the reads and on variant frequency analysis it was determined that none of the isolates with  
64 more than one *eis*-promoter mutation had a double mutation, *i.e.*, the different mutations were always  
65 on different WGS reads, suggesting differently evolved sub-clones within the same patient.  
66 Raw sequencing reads of the isolates listed in Table 1 have been deposited at the European Nucleotide  
67 Archive (PRJEB41458).

68

69

## 70 Limitations

71 The presented study made use of two different sample sets complementing each other but also baring  
72 limitations described below.

73 Not all isolates of data set 1 that were typed SLID susceptible by the MTBDRs/ were available for Sanger  
74 sequencing due to insufficient sample volumes, contamination, or loss of viability. The proportion of  
75 missed *eis*-promoter mutations could therefore be higher.

76 Despite analyzing data collected over the last 25 years, no conclusions about the prevalence of *eis*-  
77 promoter mutations across that period can be drawn, as sample set 2 of this study was a convenience  
78 sample of WGS isolates collected from several studies with different research questions. All WGS isolates  
79 irrespective of their phenotypic status were screened for *eis*-promoter mutations, but only representatives  
80 of those carrying such a mutation were further analyzed. However, in combination with data set 1 – which  
81 is surveillance data from one year of the rifampicin-resistant *Mtb* population in the WCP – our data provide  
82 insights on the type and frequency of *eis*-promoter mutations present in the WCP.

83 Unfortunately, no data on treatment outcome of the patients was available for analysis and no conclusions  
84 on the clinical impact of the detected *eis*-promoter mutations can be drawn. Similarly, sub-culturing is  
85 required to determine KAN MICs. As some of the isolates lost viability, the impact of these isolate's  
86 mutations on the MIC could not be determined.

87  
88 In this study, the MIC was only determined once. For susceptible isolates with an MIC near the clinical  
89 breakpoint of 2.5ug/ml (*e.g.*, table 2) a repetition of the MIC may have resulted in a slightly elevated MIC  
90 and therefore in low-level KAN resistance.

91  
92 Our results do not allow to make any conclusions on whether *eis*-promoter mutations act as  
93 steppingstones for the acquisition of high-level resistance for KAN (and/or AMK). To analyze this, further  
94 *in vitro* experiments, and analyses of serial samples would be required to investigate the development of  
95 resistance over time with and without drug pressure.

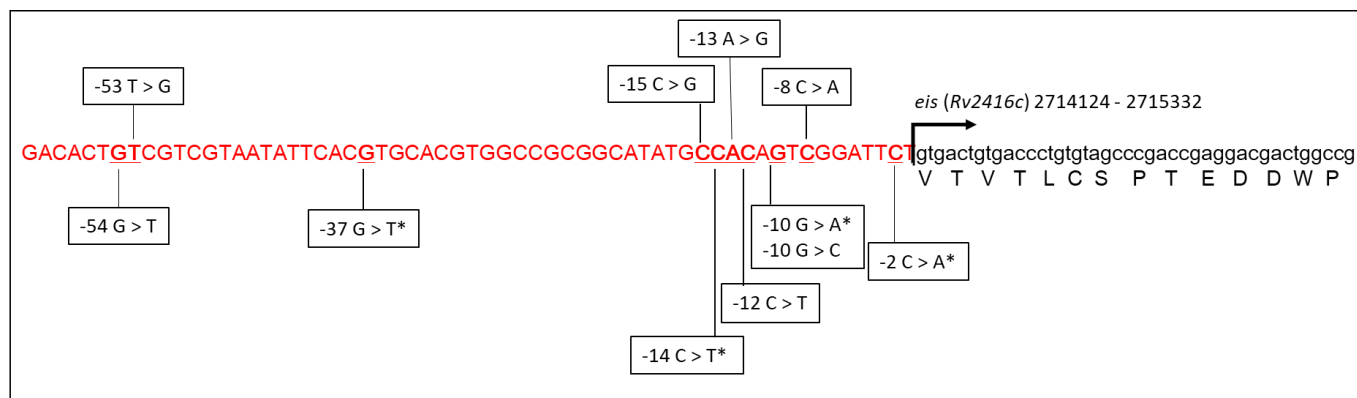

99 **Supplementary Figure 1:** *Mycobacterium tuberculosis* H37Rv coding sequence of the gene *eis* (Rv2416c;  
 100 black) and 60bp of its promoter region (red), with the known kanamycin resistance conferring mutations  
 101 according to Coll *et al* and Miotto *et al* (12, 13). The mutations -15 C > G and -10 G > C are mutations  
 102 disputed to confer resistance. The GenoType MTBDRs/ VER 2.0 assay (Hain Lifescience, Germany) defines  
 103 specific banding patterns for only the most common *eis*-promoter mutations (marked with \*). The  
 104 remaining *eis*-promoter mutations may however also cause a failing wild type band, which would then be  
 105 interpreted as “undefined mutation detected” (2).

106

107

108

109 **Supplementary Table 1:** *Eis*-promoter mutations and their frequency in 2863 whole genome sequenced  
 110 isolates

111

112 **Supplementary Table 2:** Additional information on the samples and patients of data set 2

113 M = male; F = female

114

115

## 116 References

117

118 1. Hall, T.A. 1999. BioEdit: A User-Friendly Biological Sequence Alignment Editor and Analysis Program  
 119 for Windows 95/98/NT. Nucleic Acids Symp Ser 41:95–98.

120 2. Hain Lifescience. 2016. Instructions for Use for GenoType MTBDRs/ VER 2.0.

- 121 3. Canetti G, Fox W, Khomenko A, Mahler HT, Menon NK, Mitchison DA, Rist N, Smelev NA. 1969.  
122 Advances in techniques of testing mycobacterial drug sensitivity, and the use of sensitivity tests in  
123 tuberculosis control programmes. Bull World Health Organ 41:21–43.
- 124 4. World Health Organization. 2018. Technical Report on critical concentrations for drug susceptibility  
125 testing of medicines used in the treatment of drug-resistant tuberculosis. Technical Report,  
126 Geneva, Switzerland.
- 127 5. Springer B, Lucke K, Calligaris-Maibach R, Ritter C, Böttger EC. 2009. Quantitative drug susceptibility  
128 testing of Mycobacterium tuberculosis by use of MGIT 960 and EpiCenter instrumentation. J Clin  
129 Microbiol 47:1773–1780.
- 130 6. Warren R, de Kock M, Engelke E, Myburgh R, Gey van Pittius N, Victor T, van Helden P. 2006. Safe  
131 Mycobacterium tuberculosis DNA extraction method that does not compromise integrity. J Clin  
132 Microbiol 44:254–256.
- 133 7. Li H, Handsaker B, Wysoker A, Fennell T, Ruan J, Homer N, Marth G, Abecasis G, Durbin R, 1000  
134 Genome Project Data Processing Subgroup. 2009. The Sequence Alignment/Map format and  
135 SAMtools. Bioinforma Oxf Engl 25:2078–2079.
- 136 8. NOCOCRAFT. 2014. NovoAlign Powerful tool designed for mapping of short reads onto a reference  
137 genome from Illumina, Ion Torrent, and 454 NGS platforms.
- 138 9. Wellcome Trust Sanger Institute, Ponstingl H. SMALT (C) 2010 - 2015 Genome Research Ltd.
- 139 10. McKenna A, Hanna M, Banks E, Sivachenko A, Cibulskis K, Kernytsky A, Garimella K, Altshuler D,  
140 Gabriel S, Daly M, DePristo MA. 2010. The Genome Analysis Toolkit: a MapReduce framework for  
141 analyzing next-generation DNA sequencing data. Genome Res 20:1297–1303.

- 142 11. Black PA, de Vos M, Louw GE, van der Merwe RG, Dippenaar A, Streicher EM, Abdallah AM,  
143 Sampson SL, Victor TC, Dolby T, Simpson JA, van Helden PD, Warren RM, Pain A. 2015. Whole  
144 genome sequencing reveals genomic heterogeneity and antibiotic purification in *Mycobacterium*  
145 tuberculosis isolates. *BMC Genomics* 16:857.
- 146 12. Miotto P, Tessema B, Tagliani E, Chindelevitch L, Starks AM, Emerson C, Hanna D, Kim PS, Liwski R,  
147 Zignol M, Gilpin C, Niemann S, Denkinge CM, Fleming J, Warren RM, Crook D, Posey J, Gagneux S,  
148 Hoffner S, Rodrigues C, Comas I, Engelthaler DM, Murray M, Alland D, Rigouts L, Lange C, Dheda K,  
149 Hasan R, Ranganathan UDK, McNerney R, Ezewudo M, Cirillo DM, Schito M, Köser CU, Rodwell TC.  
150 2017. A standardised method for interpreting the association between mutations and phenotypic  
151 drug resistance in *Mycobacterium tuberculosis*. *Eur Respir J* 50.
- 152 13. Coll F, Phelan J, Hill-Cawthorne GA, Nair MB, Mallard K, Ali S, Abdallah AM, Alghamdi S, Alsomali M,  
153 Ahmed AO, Portelli S, Oppong Y, Alves A, Bessa TB, Campino S, Caws M, Chatterjee A, Crampin AC,  
154 Dheda K, Furnham N, Glynn JR, Grandjean L, Minh Ha D, Hasan R, Hasan Z, Hibberd ML, Joloba M,  
155 Jones-López EC, Matsumoto T, Miranda A, Moore DJ, Mocillo N, Panaiotov S, Parkhill J, Penha C,  
156 Perdigão J, Portugal I, Rchiad Z, Robledo J, Sheen P, Shesha NT, Sirgel FA, Sola C, Oliveira Sousa E,  
157 Streicher EM, Helden PV, Viveiros M, Warren RM, McNerney R, Pain A, Clark TG. 2018. Genome-  
158 wide analysis of multi- and extensively drug-resistant *Mycobacterium tuberculosis*. *Nat Genet*  
159 50:307–316.
- 160 14. Carver T, Berriman M, Tivey A, Patel C, Böhme U, Barrell BG, Parkhill J, Rajandream M-A. 2008.  
161 Artemis and ACT: viewing, annotating and comparing sequences stored in a relational database.  
162 *Bioinforma Oxf Engl* 24:2672–2676.

163
